# Supplementary material for: Arsenic quantification and speciation at trace levels in natural water samples by total reflection X-ray fluorescence after pre-concentration with N-methyl-d-glucamine functionalized quartz supports
Source: Royal Society of Chemistry journal article supplement (doi:10.1039/d0ja00385a), 2020-01-01
Supplement: d0ja00385a1.pdf [file d0ja00385a1.pdf]

## Supporting Information

### **Arsenic Quantification and Speciation at Trace Levels in Natural Water Samples by Total Reflection X-ray Fluorescence after Pre-concentration with *N*-Methyl-D-Glucamine Functionalized Quartz Supports**

Kaushik Sanyal<sup>a\*</sup>, Sankararao Chappa<sup>b§</sup>, J. Bahadur<sup>c</sup>, Ashok. K. Pandey<sup>b, d</sup>, N.L. Mishra<sup>a, d, #</sup>

<sup>a</sup>Fuel Chemistry Division, Bhabha Atomic Research Centre, Trombay, Mumbai 400085, India

<sup>b</sup>Radiochemistry Division, Bhabha Atomic Research Centre, Trombay, Mumbai 400085, India

<sup>c</sup>Solid State Physics Division, Bhabha Atomic Research Centre, Trombay, Mumbai 400 085, India

<sup>d</sup>Homi Bhabha National Institute, Anushaktinagar, Mumbai 400085, India

Corresponding author email id: [ksanyal@barc.gov.in](mailto:ksanyal@barc.gov.in), [kaushik.sanyal88@gmail.com](mailto:kaushik.sanyal88@gmail.com)

#: Retired on superannuation. Resent Contact address [nlmishra@yahoo.com](mailto:nlmishra@yahoo.com), \*: Former research fellow

**Figure S1.** Photograph of quartz sample supports after the immobilization of NMDG on their top surfaces.

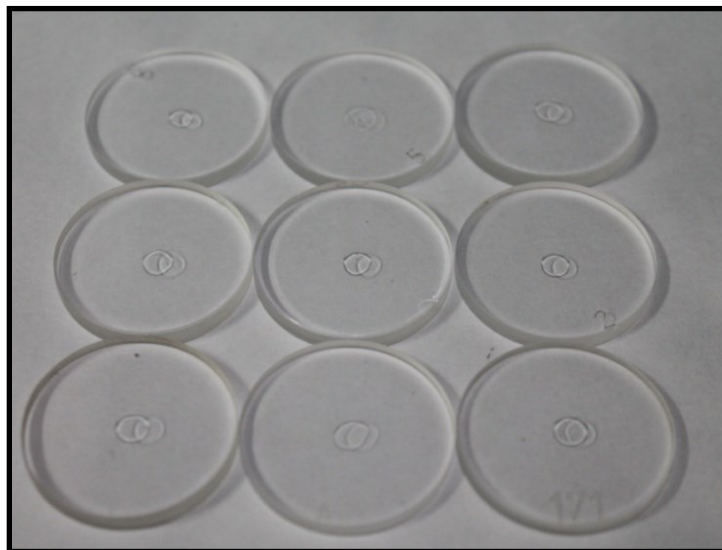

Figure S2. TXRF spectrum of the NMDG modified-quartz support loaded with Au NPs.

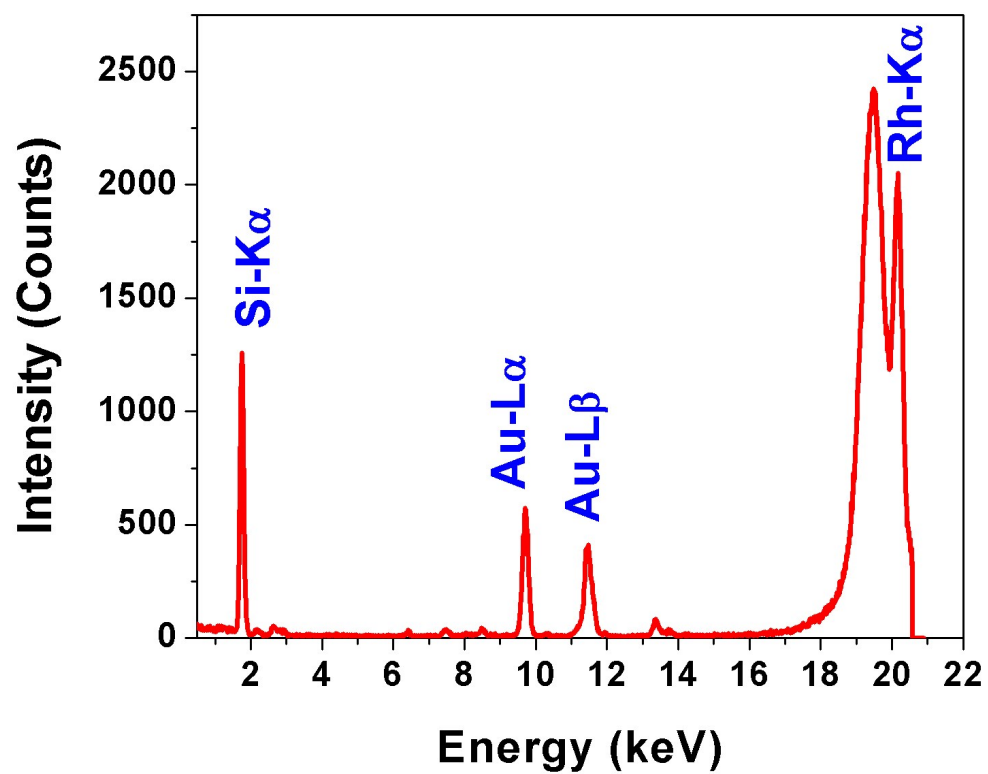

**Figure S3.** Absorption spectra of the Au-loaded NMDG modified-quartz support showing the surface Plasmon resonance around 500-600 nm attributed to AuNPs.

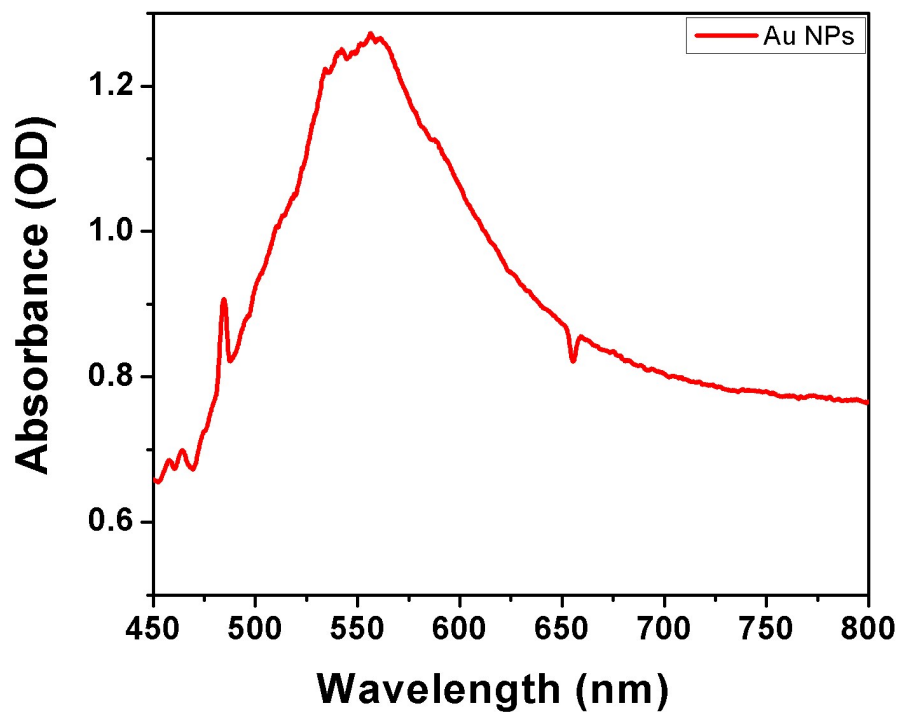

**Figure S4.** The estimated size distribution of Au NPs on NMDG modified-quartz support obtained from the FESEMmicrographsimage analysis. Image J software was used to estimate the size distribution of the gold nano-particles. The Y axis shows the no of particles and X axis shows the size of the Au-Nps.<sup>1</sup>

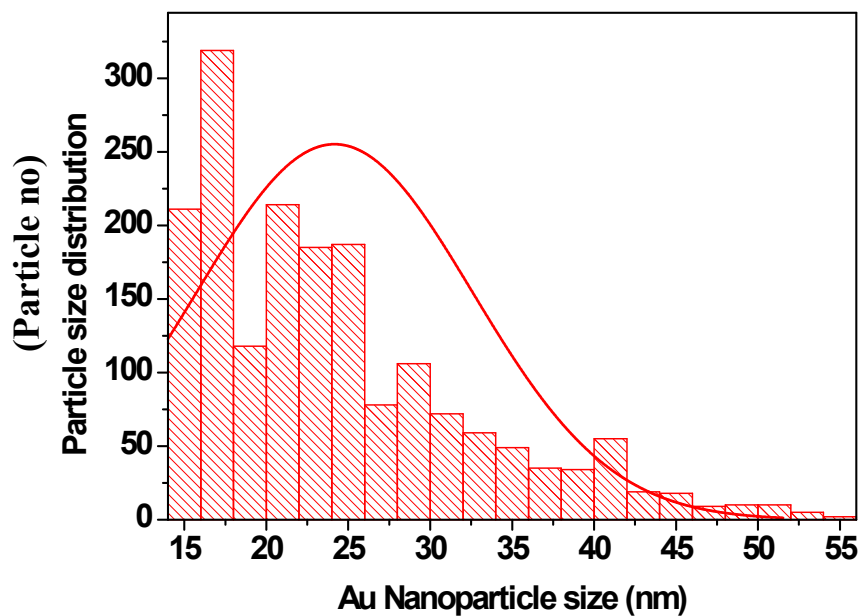

**Figure S5.** As (V)-sorption efficiency of the NMDG modified-quartz as a function of pH of its' aqueous solution. The error bars represent the standard deviation in the measurements of As  $K\alpha$ /Au  $L\alpha$  ratio (n=3, 1 $\sigma$ )

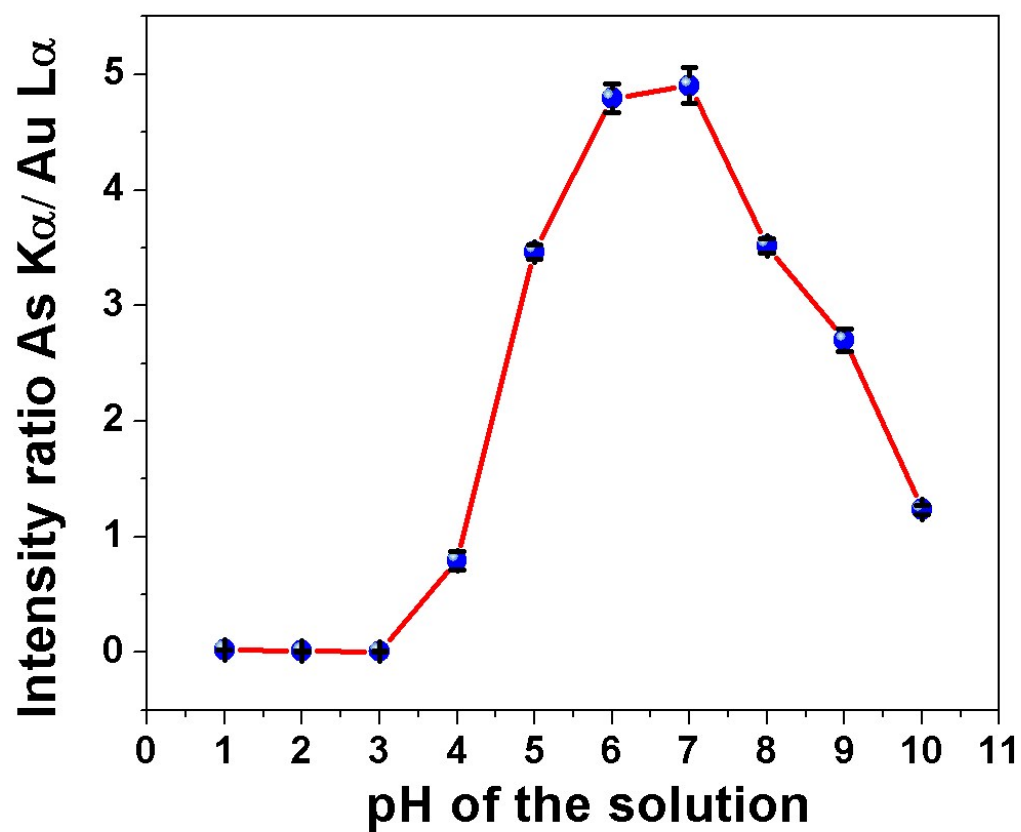

**Figure S6.** Effect of aqueous sample volume on the As (V) sorption in NMDG modified-quartz sample supports equilibrated for 6 hrs without stirring. The error bars represent the standard deviation in the measurements of As  $K\alpha$ /Au  $L\alpha$  ratio ( $n=3, 1\sigma$ )

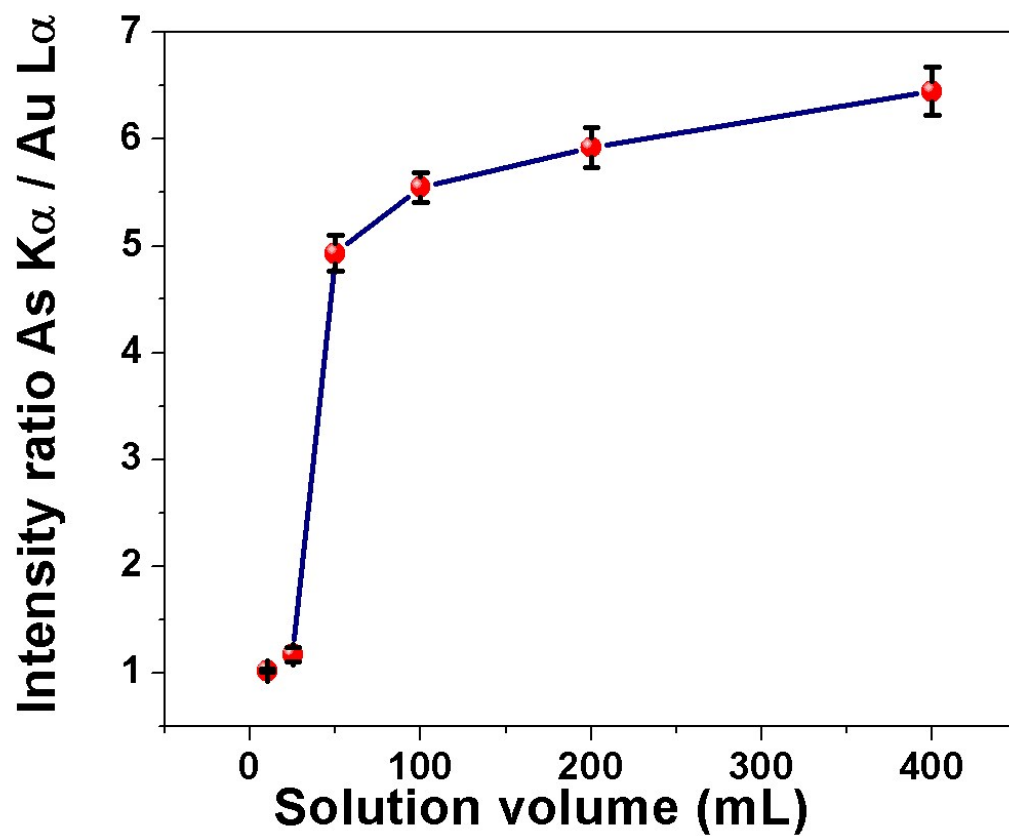

**Figure S7.** Linear calibration plot obtained from the TXRF spectra of standard solutions by plotting As  $K\alpha$ /Au  $L\alpha$  ratios obtained from the respective TXRF spectra measured with As (V) sorbed on the Au Nps loaded NMDG modified-quartz supports against the As (V) concentration in the solutions. The error bars represent the standard deviation in the measurements of As  $K\alpha$ /Au  $L\alpha$  ratio ( $n=3, 1\sigma$ )

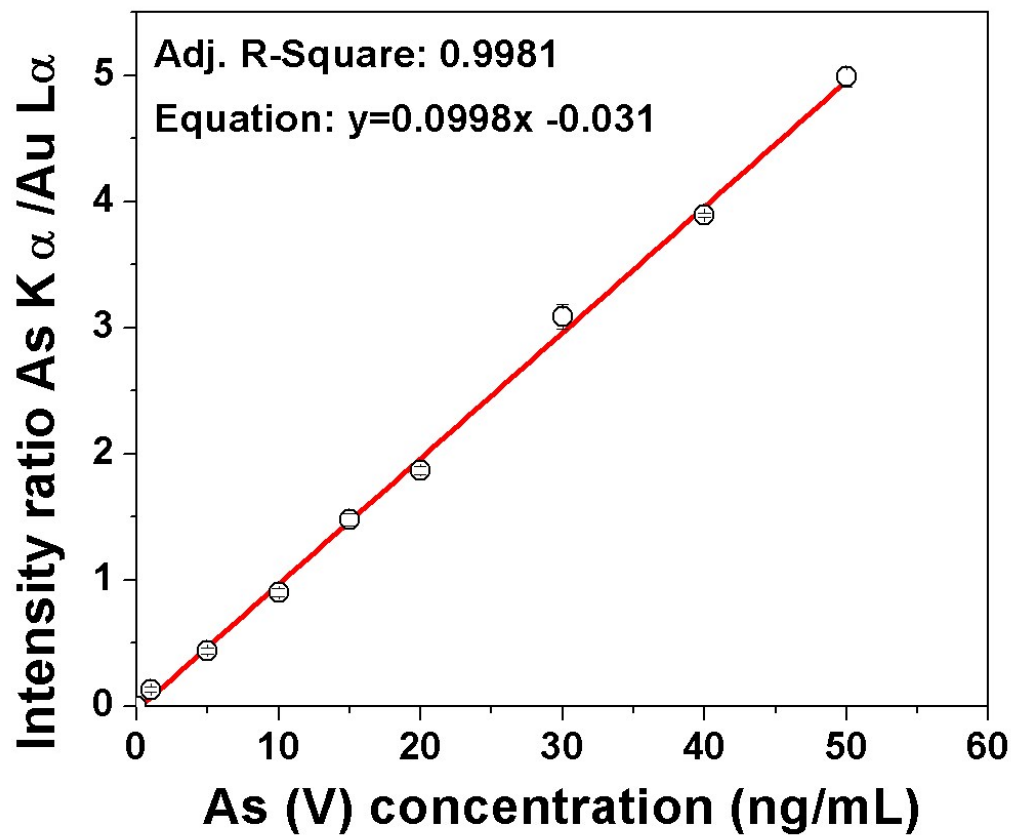



**Table S1.** TXRF results for the determinations of the total arsenic content in five simulated samples having different As (III) and As (V) concentrations (sample volume 50 mL, n = 3).

| Added arsenic Conc.<br>(ng/mL)<br>(A)                                                                     |        | TXRF determined<br>arsenic Conc. (ng/mL)<br>(B) |            | (B/A)    |        |
|-----------------------------------------------------------------------------------------------------------|--------|-------------------------------------------------|------------|----------|--------|
| As (III)                                                                                                  | As (V) | As (III)                                        | As (V)     | As (III) | As (V) |
| -                                                                                                         | 25     | -                                               | 26 ± 2     | -        | 1.04   |
| 1.5                                                                                                       | 1.5    | 1.5 ± 0.1                                       | 1.5 ± 0.1  | 1.00     | 1.00   |
| 5                                                                                                         | 2      | 4.8 ± 0.5                                       | 2.1 ± 0.1  | 0.96     | 1.05   |
| 10                                                                                                        | 20     | 10.8 ± 0.4                                      | 19.4 ± 0.6 | 1.08     | 0.97   |
| 25                                                                                                        | -      | 26 ± 2                                          | -          | 1.04     | -      |
| For As (III): Average RSD (16, n=3) = 7.1%, Average Deviation of TXRF values from the expected values =4% |        |                                                 |            |          |        |
| For As (V): Average RSD(16, n=3) = 5.6%, Average Deviation of TXRF values from the expected values=3%     |        |                                                 |            |          |        |

## References

1. Schneider, C.A., Rasband, W.S., Eliceiri, K.W. "NIH Image to Image J: 25 years of image analysis", *Nature Methods*, 2012, **9**, 671-675.
